# Supplementary material
Source: PubMed Central journal article supplement (PMC4077789)
Supplement: NIHMS604526-supplement-Supplementary_data.pdf [file NIHMS604526-supplement-Supplementary_data.pdf]

# Prioritization of neurodevelopmental disease genes by discovery of new mutations

Alexander Hoischen, Niklas Krumm & Evan E Eichler

**Supplementary Table 1 Genes implicated in developmental disorders (germline mutations) and cancer (somatic mutations)**

| Gene                                                                                                                        | Germline mutations                                                                                                                                                          |                                                                                      |                     | Somatic mutations              |                                                        |                                                   |
|-----------------------------------------------------------------------------------------------------------------------------|-----------------------------------------------------------------------------------------------------------------------------------------------------------------------------|--------------------------------------------------------------------------------------|---------------------|--------------------------------|--------------------------------------------------------|---------------------------------------------------|
|                                                                                                                             | Neurodevelopmental disorder                                                                                                                                                 | PubMed ID                                                                            | Mutation types      | Cancer types / malignancies    | PubMed ID                                              | Mutation types                                    |
| <b>Isolated neurodevelopmental phenotypes and cancer</b>                                                                    |                                                                                                                                                                             |                                                                                      |                     |                                |                                                        |                                                   |
| <i>PTEN</i>                                                                                                                 | ASD, Cowden syndrome <sup>a</sup>                                                                                                                                           | <a href="#">23160955</a> ,<br><a href="#">9259288</a>                                | LoF, missense       | Many types                     | <a href="#">21252315</a>                               | Missense, LoF                                     |
| <i>CTCF</i>                                                                                                                 | ID                                                                                                                                                                          | <a href="#">23746550</a>                                                             | LoF                 | Breast cancer, prostate cancer | <a href="#">9591631</a>                                | Deletion                                          |
| <i>ARID1B</i> (SWI/SNF complex)                                                                                             | ID, ASD, Coffin-Siris syndrome                                                                                                                                              | <a href="#">22426309</a> ,<br><a href="#">22426308</a>                               | LoF                 | Many types                     | <a href="#">22426308</a>                               | LoF                                               |
| <b>Clinically defined neurodevelopmental syndromes and cancer</b>                                                           |                                                                                                                                                                             |                                                                                      |                     |                                |                                                        |                                                   |
| <i>MED12</i>                                                                                                                | Lujan-Fryns syndrome, Ohdo syndrome, Opitz-Kaveggia syndrome                                                                                                                | <a href="#">17369503</a> ,<br><a href="#">23395478</a> ,<br><a href="#">20711175</a> | Missense            | Prostate cancer                | <a href="#">22610119</a>                               | Missense                                          |
| <i>MLL2</i> ( <i>KMT2D</i> )                                                                                                | Kabuki syndrome                                                                                                                                                             | <a href="#">20711175</a>                                                             | LoF, CNV, missense  | Many types                     | <a href="#">21796119</a> ,<br><a href="#">21163964</a> | LoF, missense                                     |
| <i>CREBBP</i>                                                                                                               | Rubinstein-Taybi syndrome; epilepsy                                                                                                                                         | <a href="#">7630403</a> ,<br><a href="#">11331617</a>                                | LoF, CNV, missense  | ALL                            | <a href="#">21390130</a>                               | LoF, missense                                     |
| <i>ATRX</i>                                                                                                                 | X-linked $\alpha$ -thalassemia–mental retardation syndrome                                                                                                                  | <a href="#">7697714</a>                                                              | Missense, LoF       | PanNET, glioblastoma           | <a href="#">21252315</a> ,<br><a href="#">22286061</a> | Missense, LoF                                     |
| <b>Identical mutations in neurodevelopmental phenotypes and cancer</b>                                                      |                                                                                                                                                                             |                                                                                      |                     |                                |                                                        |                                                   |
| <i>ASXL1</i>                                                                                                                | Bohring-Opitz syndrome                                                                                                                                                      | <a href="#">21706002</a>                                                             | LoF                 | Myeloid malignancies           | <a href="#">19388938</a>                               | LoF                                               |
| <i>SETBP1</i>                                                                                                               | Schinzel-Giedion syndrome                                                                                                                                                   | <a href="#">20436468</a>                                                             | GoF                 | Leukemia                       | <a href="#">23222956</a>                               | GoF                                               |
| <i>EZH2</i>                                                                                                                 | Weaver syndrome <sup>a</sup>                                                                                                                                                | <a href="#">22177091</a>                                                             | GoF                 | B-cell lymphoma                | <a href="#">20081860</a>                               | GoF                                               |
| 'Paternal age–effect disorders' ( <i>FGFR2</i> , <i>FGFR3</i> , <i>HRAS</i> , <i>PTPN11</i> , <i>BRAF</i> , <i>MAP2K1</i> ) | Apert syndrome, Crouzon-Pfeiffer syndrome, achondroplasia, Muenke syndrome, Costello syndrome <sup>a</sup> , Noonan syndrome <sup>a</sup> , cardio-facio-cutaneous syndrome | <a href="#">22325359</a>                                                             | GoF                 | Many types                     | <a href="#">22325359</a>                               | GoF                                               |
| <b>Different mutation types observed in neurodevelopmental phenotypes and cancer</b>                                        |                                                                                                                                                                             |                                                                                      |                     |                                |                                                        |                                                   |
| <i>CTNNB1</i>                                                                                                               | ID and ASD                                                                                                                                                                  | <a href="#">23033978</a>                                                             | LoF                 | Many types                     | <a href="#">12060769</a>                               | Activating?, LoF?                                 |
| <i>CHD7</i>                                                                                                                 | CHARGE syndrome                                                                                                                                                             | <a href="#">15300250</a>                                                             | CNVs, LoF, missense | Small-cell lung cancer         | <a href="#">20016488</a>                               | Duplications, CNV, amplifications, translocations |
| <i>MYCN</i>                                                                                                                 | Feingold syndrome                                                                                                                                                           | <a href="#">15821734</a>                                                             | LoF, missense       | Neuroblastoma                  | <a href="#">6197179</a>                                | Amplification                                     |
| <i>ABCC9</i>                                                                                                                | Cantu syndrome                                                                                                                                                              | <a href="#">22610116</a> ,<br><a href="#">22608503</a>                               | GoF                 | Endometrial cancer             | <a href="#">23104009</a>                               | Missense                                          |

PanNET, pancreatic neuroendocrine tumors; ALL, acute lymphoblastic leukemia; AML, acute myeloid leukemia.

<sup>a</sup>Patients have increased risk of cancer.
